# Supplementary material
Source: PubMed Central journal article supplement (PMC1871867)
Supplement: pnas_0607622104_1.pdf [file pnas_0607622104_1.pdf]

Flag-Dyn2:

- Cyp-HA  
- Nef-HA  
- Nef<sub>G2,3A</sub>-HA  
+ Cyp-HA  
+ Nef-HA  
+ Nef<sub>G2,3A</sub>-HA  
1/3 input

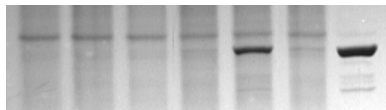

— FLAG-Dyn2

anti-HA  
light chain

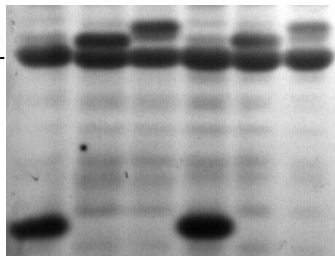

— Nef<sub>G2,3A</sub>-HA

— Nef-HA

— Cyp-HA
