# Supplementary material
Source: PubMed Central journal article supplement (PMC1871867)

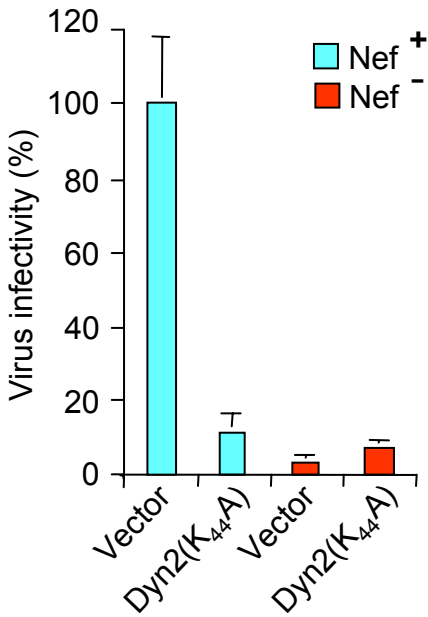

Supplement: pnas_0607622104_2.pdf [file pnas_0607622104_2.pdf]

**A**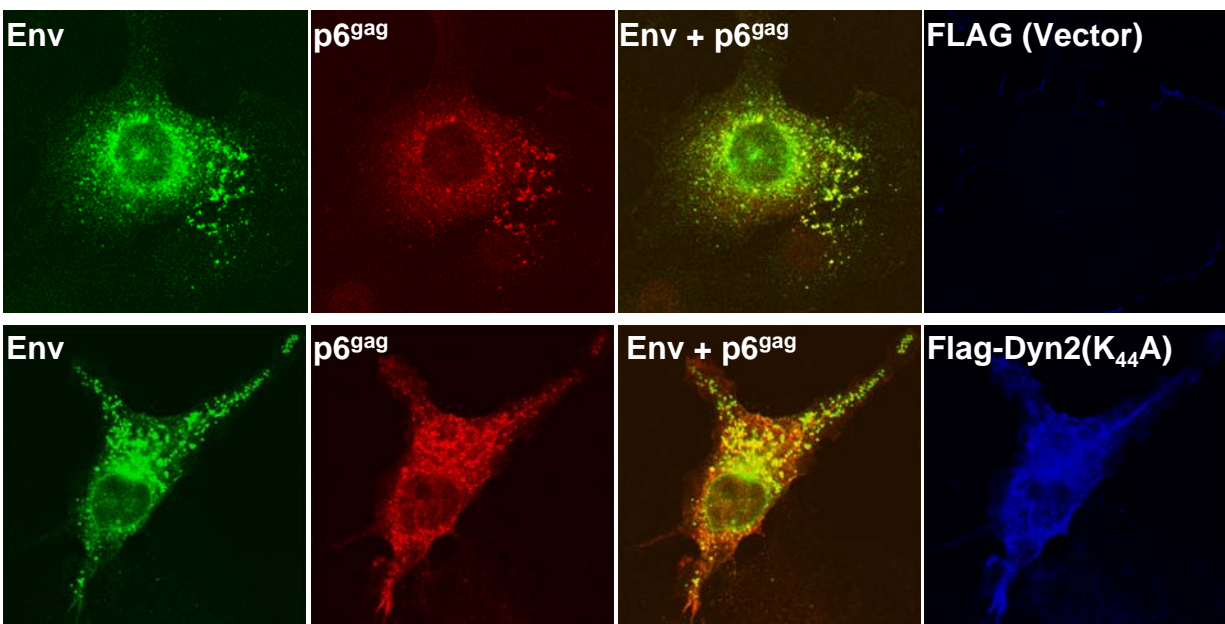**B**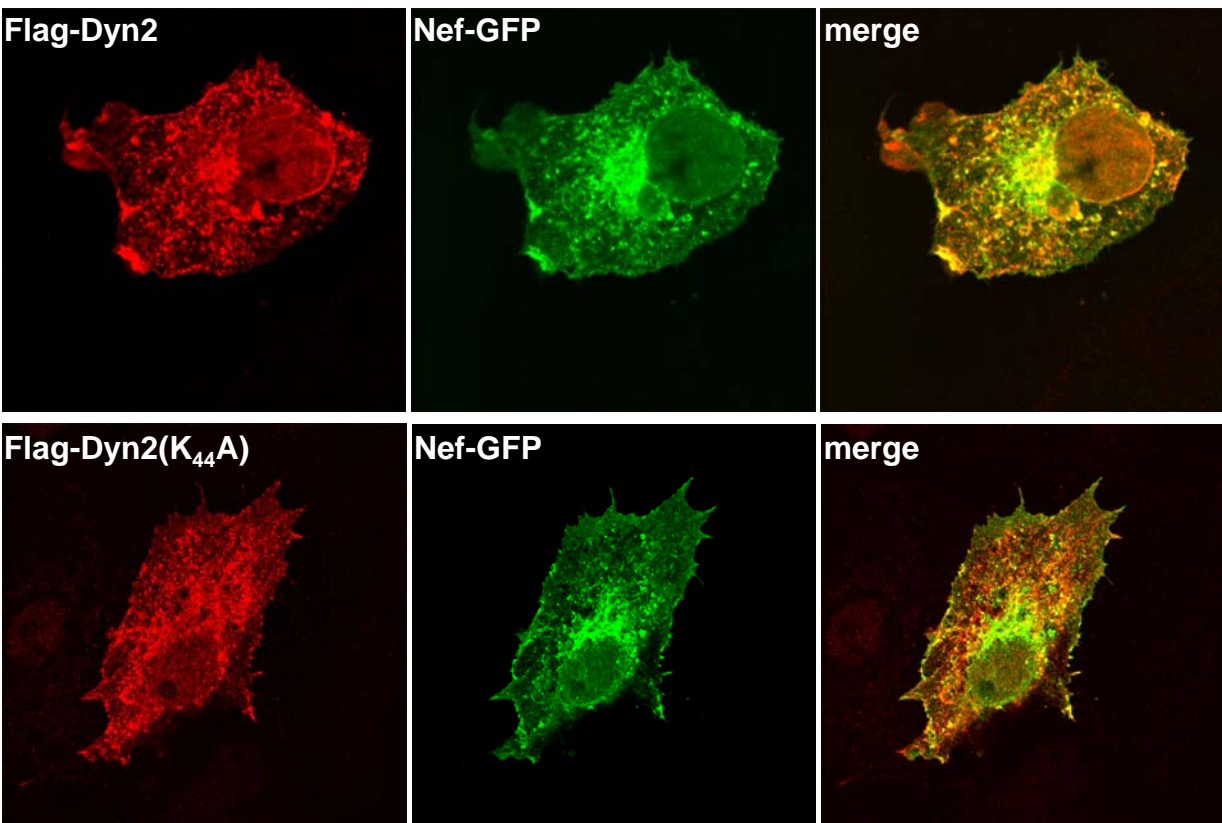

Supplement: pnas_0607622104_3.pdf [file pnas_0607622104_3.pdf]

**A***Dyn2*siRNA

■ Nef -  
■ Nef +

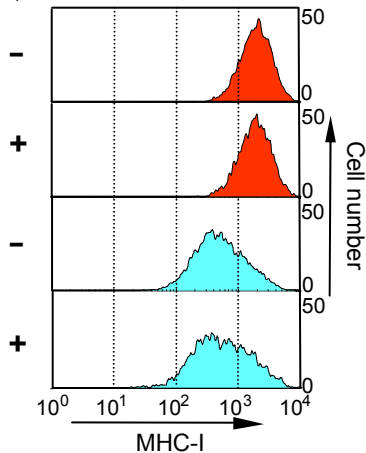**B**

*Dyn2*siRNA  
*Dynr*

■ Nef -  
■ Nef +

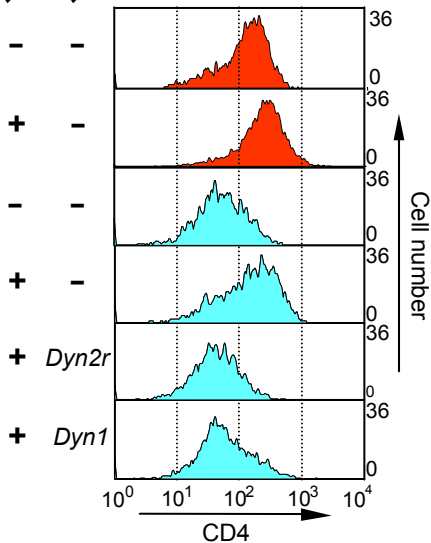

Supplement: pnas_0607622104_4.pdf [file pnas_0607622104_4.pdf]

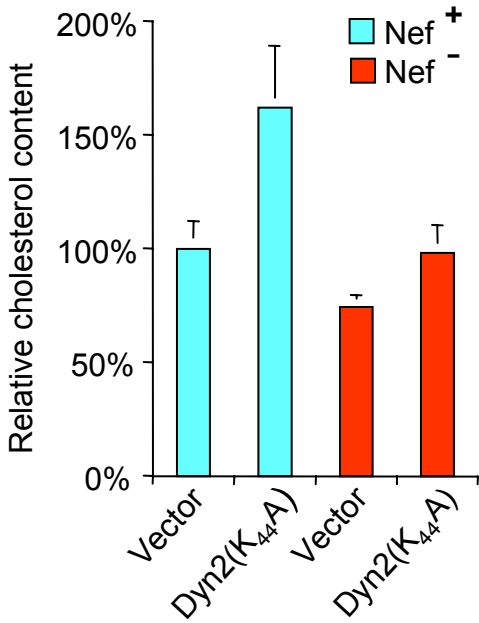

Supplement: pnas_0607622104_5.pdf [file pnas_0607622104_5.pdf]
